# Supplementary material
Source: HighWire-hosted journal article supplement (https://cmajopen.ca/highwire/filestream/81356/field_highwire_adjunct_files/3/2019-0060-GRIPP-checklist.pdf)
Supplement: 2019-0060-GRIPP-checklist.pdf [file 2019-0060-GRIPP-checklist.pdf]

| <b>Table 1   GRIPP2 long form</b>                      |                                                                                                                                                             |                            |
|--------------------------------------------------------|-------------------------------------------------------------------------------------------------------------------------------------------------------------|----------------------------|
| <b>Section and topic</b>                               | <b>Item</b>                                                                                                                                                 | <b>Reported on page No</b> |
| <b>Section 1: Abstract of paper</b>                    |                                                                                                                                                             |                            |
| 1a: Aim                                                | Report the aim of the study                                                                                                                                 | p.1 & 2                    |
| 1b: Methods                                            | Describe the methods used by which patients and the public were involved                                                                                    | p.1 & 2                    |
| 1c: Results                                            | Report the impacts and outcomes of PPI in the study                                                                                                         | p.1 & 2                    |
| 1d: Conclusions                                        | Summarise the main conclusions of the study                                                                                                                 | p.1 & 2                    |
| 1e: Keywords                                           | Include PPI, “patient and public involvement,” or alternative terms as keywords                                                                             | p.1                        |
| <b>Section 2: Background to paper</b>                  |                                                                                                                                                             |                            |
| 2a: Definition                                         | Report the definition of PPI used in the study and how it links to comparable studies                                                                       | p.3 & 5                    |
| 2b: Theoretical underpinnings                          | Report the theoretical rationale and any theoretical influences relating to PPI in the study                                                                | p.3-5                      |
| 2c: Concepts and theory development                    | Report any conceptual models or influences used in the study                                                                                                | p.3-5                      |
| <b>Section 3: Aims of paper</b>                        |                                                                                                                                                             |                            |
| 3: Aim                                                 | Report the aim of the study                                                                                                                                 | p.4                        |
| <b>Section 4: Methods of paper</b>                     |                                                                                                                                                             |                            |
| 4a: Design                                             | Provide a clear description of methods by which patients and the public were involved                                                                       | p.4-7; Table 1             |
| 4b: People involved                                    | Provide a description of patients, carers, and the public involved with the PPI activity in the study                                                       | p.4-7; Tables 1 & 2        |
| 4c: Stages of involvement                              | Report on how PPI is used at different stages of the study                                                                                                  | p.4-7; Table 1             |
| 4d: Level or nature of involvement                     | Report the level or nature of PPI used at various stages of the study                                                                                       | p.4-7; Table 1             |
| <b>Section 5: Capture or measurement of PPI impact</b> |                                                                                                                                                             |                            |
| 5a: Qualitative evidence of impact                     | If applicable, report the methods used to qualitatively explore the impact of PPI in the study                                                              | p.7                        |
| 5b: Quantitative evidence of impact                    | If applicable, report the methods used to quantitatively measure or assess the impact of PPI                                                                | p.7                        |
| 5c: Robustness of measure                              | If applicable, report the rigour of the method used to capture or measure the impact of PPI                                                                 | p.7                        |
| <b>Section 6: Economic assessment</b>                  |                                                                                                                                                             |                            |
| 6: Economic assessment                                 | If applicable, report the method used for an economic assessment of PPI                                                                                     | N/A                        |
| <b>Section 7: Study results</b>                        |                                                                                                                                                             |                            |
| 7a: Outcomes of PPI                                    | Report the results of PPI in the study, including both positive and negative outcomes                                                                       | p.8-12; Table 3 & 4        |
| 7b: Impacts of PPI                                     | Report the positive and negative impacts that PPI has had on the research, the individuals involved (including patients and researchers), and wider impacts | p.8-12; Table 4            |
| 7c: Context of PPI                                     | Report the influence of any contextual factors that enabled or hindered the process or impact of PPI                                                        | p.8-12; Table 4            |
| 7d: Process of PPI                                     | Report the influence of any process factors, that enabled or hindered the impact of PPI                                                                     | p.8-12; Table 4            |

|                                              |                                                                                                                                                                                               |                  |
|----------------------------------------------|-----------------------------------------------------------------------------------------------------------------------------------------------------------------------------------------------|------------------|
| 7ei: Theory development                      | Report any conceptual or theoretical development in PPI that have emerged                                                                                                                     | p.8-12           |
| 7eii: Theory development                     | Report testing of theoretical models, if any                                                                                                                                                  | N/A              |
| 7f: Measurement                              | If applicable, report all aspects of instrument development and testing (eg, validity, reliability, feasibility, acceptability, responsiveness, interpretability, appropriateness, precision) | N/A              |
| 7g: Economic assessment                      | Report any information on the costs or benefit of PPI                                                                                                                                         | p.5, 6, & 7      |
| <b>Section 8: Discussion and conclusions</b> |                                                                                                                                                                                               |                  |
| 8a: Outcomes                                 | Comment on how PPI influenced the study overall. Describe positive and negative effects                                                                                                       | p. 8-12          |
| 8b: Impacts                                  | Comment on the different impacts of PPI identified in this study and how they contribute to new knowledge                                                                                     | p. 8-12          |
| 8c: Definition                               | Comment on the definition of PPI used (reported in the Background section) and whether or not you would suggest any changes                                                                   | p. 8-12          |
| 8d: Theoretical underpinnings                | Comment on any way your study adds to the theoretical development of PPI                                                                                                                      | p.12             |
| 8e: Context                                  | Comment on how context factors influenced PPI in the study                                                                                                                                    | p. 8-12; Table 4 |
| 8f: Process                                  | Comment on how process factors influenced PPI in the study                                                                                                                                    | p. 8-12; Table 4 |
| 8g: Measurement and capture of PPI impact    | If applicable, comment on how well PPI impact was evaluated or measured in the study                                                                                                          | p.9; Table 4     |
| 8h: Economic assessment                      | If applicable, discuss any aspects of the economic cost or benefit of PPI, particularly any suggestions for future economic modelling.                                                        | N/A              |
| 8i: Reflections/critical perspective         | Comment critically on the study, reflecting on the things that went well and those that did not, so that others can learn from this study                                                     | p.11-12; Table 4 |
